# Supplementary material
Source: publisher figshare collection journal article supplement (https://diabetesjournals.figshare.com/ndownloader/files/28950213)
Supplement: Supplementary file 1 [file 28950213]

## Supplemental Material

| <b>Table of contents</b>                                                                                                                                                                | <b>Page</b> |
|-----------------------------------------------------------------------------------------------------------------------------------------------------------------------------------------|-------------|
| Supplemental Figure S1. Flowchart of the study population                                                                                                                               | 2           |
| Supplemental Table S1. Anatomical therapeutic chemical codes used                                                                                                                       | 3           |
| Supplemental Table S2. ICD-8 and ICD-10 codes used                                                                                                                                      | 4           |
| Supplemental Table S3. Procedure codes used                                                                                                                                             | 5           |
| Supplemental Table S4. Baseline patient characteristics of persons in the general population comparison cohort                                                                          | 6           |
| Supplemental Table S5. Risk of cardiac outcomes and all-cause death in patients with incident type 2 diabetes versus matched cohort                                                     | 7           |
| Supplemental Table S6. Proportion of patients with incident type 2 diabetes redeeming prescriptions for prophylactic cardiovascular medications                                         | 8           |
| Supplemental Figure S2. Risk of cardiac outcomes and all-cause death in patients with incident type 2 diabetes versus matched cohort stratified by sex and age-group at study inclusion | 9           |
| Supplemental Table S7. Association of cardiac outcomes and all-cause death with early statin use in patients with incident type 2 diabetes                                              | 12          |

Supplemental Figure S1. Flowchart of the study population

Flowchart of the study population selection with incident type 2 diabetes and matched persons from the general population, all without prior atherosclerotic cardiovascular disease.

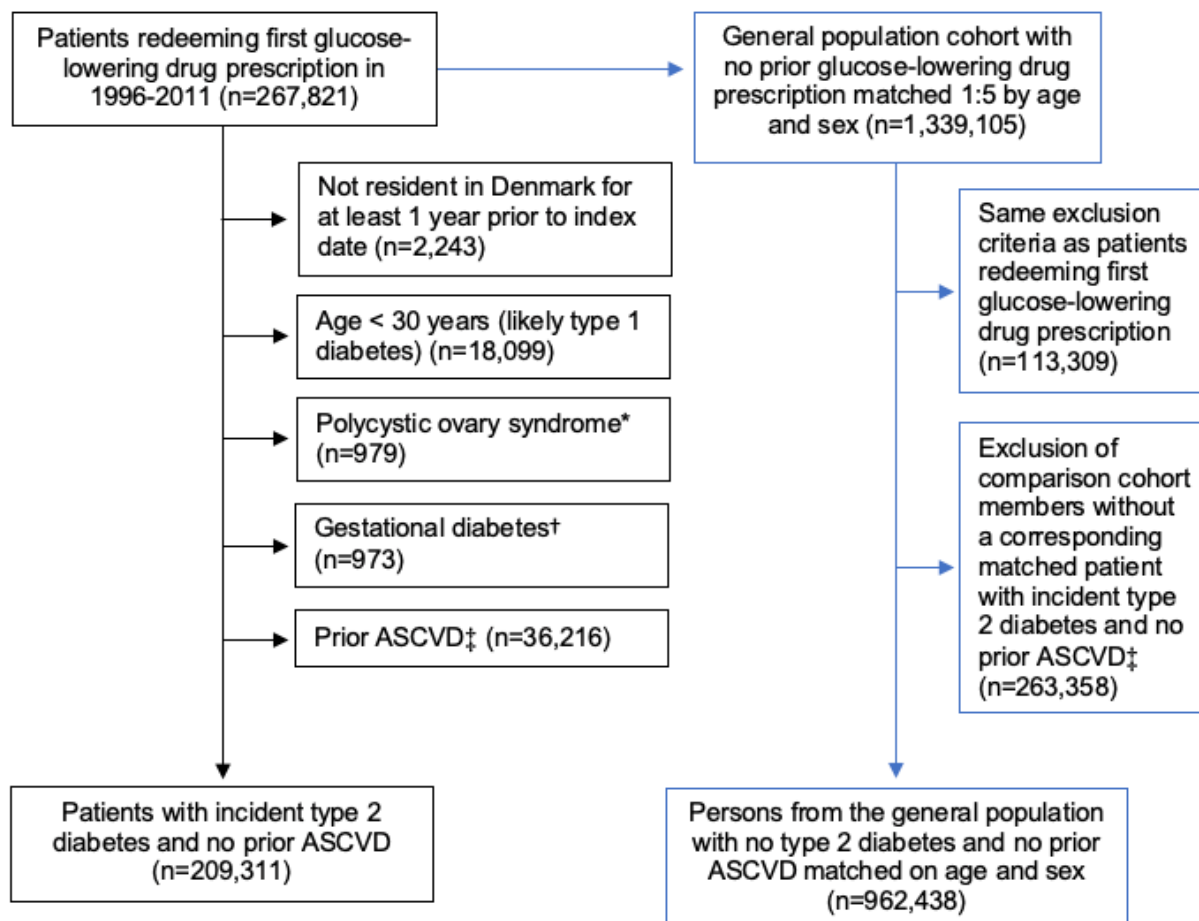

\* Polycystic ovary syndrome was defined as pre-existing hospital diagnosed polycystic ovary syndrome (ICD-10 code E28.2) or redemption of any metformin prescription (ATC code A10BA02) in combination with clomifen (ATC code G03GB02) within 12 months following inclusion.

† Gestational diabetes was defined as women giving birth (ICD-10 code O80-O84) within 9 months after inclusion.

‡ Prior atherosclerotic cardiovascular disease (ASCVD) was defined as previous diagnoses of ischemic stroke, myocardial infarction, coronary revascularization, peripheral artery disease, peripheral revascularization, and lower-limb amputation.

Supplemental Table S1. Anatomical therapeutic chemical codes used

Redemption of drug prescriptions identified in the Danish Prescription Registry using anatomical therapeutic chemical codes.

| Medication                                     | Anatomical Therapeutic Chemical Code                                                                 |
|------------------------------------------------|------------------------------------------------------------------------------------------------------|
| Insulin                                        | A10A <sup>a</sup>                                                                                    |
| Metformin                                      | A10BA <sup>a</sup> , A10BD07, A10BD08, A10BD10, A10BD11, A10BD13, A10BD15, A10BD16, A10BD20, A10BD23 |
| Sulfonylurea                                   | A10BB <sup>a</sup>                                                                                   |
| DPP-4 inhibitor                                | A10BH, A10BD07, A10BD08, A10BD10, A10BD11, A10BD13, A10BD19, A10BD21, A10BD24                        |
| Glitazone                                      | A10BG <sup>a</sup>                                                                                   |
| Statin                                         | C10AA <sup>a</sup> , C10BA <sup>a</sup>                                                              |
| Beta-blocker                                   | C07 <sup>a</sup>                                                                                     |
| Angiotensin-converting enzyme inhibitor        | C09A <sup>a</sup> , C09B <sup>a</sup>                                                                |
| Angiotensin II receptor blocker                | C09C <sup>a</sup> , C09D <sup>a</sup>                                                                |
| Calcium channel blocker                        | C08 <sup>a</sup> , C09BB, C09DB                                                                      |
| Thiazide                                       | C03AA <sup>a</sup> , C03AB <sup>a</sup> , C07B <sup>a</sup>                                          |
| Aspirin                                        | B01AC06, N02BA01                                                                                     |
| Adenosine diphosphate receptor inhibitor       | B01AC04, B01AC22, B01AC24, B01AC25                                                                   |
| Vitamin K antagonist (Warfarin, Phenprocoumon) | B01AA03, B01AA04                                                                                     |
| Clomifen                                       | G03GB02                                                                                              |
| Markers of smoking                             | R03, N07BA                                                                                           |
| Alcohol-related disorders                      | N07BB                                                                                                |

<sup>a</sup>Including underlying codes

Supplemental Table S2. ICD-8 and ICD-10 codes used

Diagnoses identified in the Danish Register of Causes of Death and the Danish National Patient Registry using the International Classification of Diseases (ICD) codes, 8<sup>th</sup> and 10<sup>th</sup> revision.

| Diagnosis                              | ICD-8 codes                                                                                                 | ICD-10 codes                                                                                                                                                                                                | Comment                                   |
|----------------------------------------|-------------------------------------------------------------------------------------------------------------|-------------------------------------------------------------------------------------------------------------------------------------------------------------------------------------------------------------|-------------------------------------------|
| Women giving birth                     |                                                                                                             | E28.2                                                                                                                                                                                                       | From the Danish National Patient Registry |
| Polycystic ovarian syndrome            |                                                                                                             | O80-O84                                                                                                                                                                                                     | From the Danish National Patient Registry |
| Cardiac death                          | 410 <sup>a</sup> -414 <sup>a</sup> , 427.2, 427.6, 427.9, 427.0, 427.1, 795 <sup>a</sup> , 796 <sup>a</sup> | I20 <sup>a</sup> -I25 <sup>a</sup> , I46 <sup>a</sup> , I47.2, I49 <sup>a</sup> , I50 <sup>a</sup> , R96 <sup>a</sup> , R98.9, R99.9                                                                        | From the Cause of Death Registry          |
| Myocardial infarction                  | 410                                                                                                         | DI21 <sup>a</sup>                                                                                                                                                                                           | From the Danish National Patient Registry |
| Ischemic stroke                        | 433, 434                                                                                                    | DI63 <sup>a</sup> , DI64 <sup>a</sup>                                                                                                                                                                       | From the Danish National Patient Registry |
| Heart failure                          | 427.09, 427.10, 427.11, 427.19, 428.99, 782.49                                                              | DI11.0, DI13.0, DI13.2, DI42.0, DI50 <sup>a</sup>                                                                                                                                                           | From the Danish National Patient Registry |
| Peripheral artery disease              | 440, 443, 444                                                                                               | DI70.1-DI70.9, DI73.9                                                                                                                                                                                       | From the Danish National Patient Registry |
| Moderate to severe renal disease       | 403, 404, 580-584, 590.09, 593.19, 753.10-753.19, 792                                                       | DI12 <sup>a</sup> , DI13 <sup>a</sup> , DN00 <sup>a</sup> -DN05 <sup>a</sup> , DN07 <sup>a</sup> , DN11 <sup>a</sup> , DN14 <sup>a</sup> , DN17 <sup>a</sup> -DN19 <sup>a</sup> , DQ61 <sup>a</sup> , BJFD2 | From the Danish National Patient Registry |
| Atrial fibrillation                    | 4274 <sup>a</sup>                                                                                           | I48 <sup>a</sup>                                                                                                                                                                                            | From the Danish National Patient Registry |
| Connective tissue disease              | 712 <sup>a</sup> , 716 <sup>a</sup> , 734 <sup>a</sup> , 446 <sup>a</sup> , 135.99                          | M05 <sup>a</sup> , M06 <sup>a</sup> , M08 <sup>a</sup> , M09 <sup>a</sup> , M30-M36 <sup>a</sup> , D86 <sup>a</sup>                                                                                         | From the Danish National Patient Registry |
| Any malignancy (excluding skin cancer) | 140-194 <sup>a</sup> , 204-207 <sup>a</sup> , 200-203 <sup>a</sup> , 275.59                                 | C00-C43 <sup>a</sup> , C45-C96 <sup>a</sup>                                                                                                                                                                 | From the Danish National Patient Registry |
| Moderate to severe liver disease       | 070.00, 070.02, 070.04, 070.06, 070.08, 573.00, 456.00-456.09                                               | B15.0, B16.0, B16.2, B19.0, K70.4, K72, K76.6, I85                                                                                                                                                          | From the Danish National Patient Registry |
| Markers of smoking                     | 491, 492                                                                                                    | F17, J40-J44, Z72.0, Z71.6                                                                                                                                                                                  | From the Danish National Patient Registry |
| Obesity                                | 277.99                                                                                                      | E65-E68                                                                                                                                                                                                     | From the Danish National Patient Registry |
| Alcohol-related disorders              | 291, 303.09-303.99, 456.00-456.09, 577.10, 571.10, 571.09, 979                                              | E244, F10, G312, G721, I426, K70, K292, K852, K860, Z714, Z721, DQ860, DZ502                                                                                                                                | From the Danish National Patient Registry |

<sup>a</sup>Including underlying diagnosis codes

Procedures identified using surgical codes the Danish National Patient Registry and from the NOMESCO Classification of Surgical Procedures.

<sup>a</sup>Including underlying procedure codes

Supplemental Table S4. Baseline patient characteristics of persons in the general population comparison cohort

|                                        | Comparison cohort for all analyses (no. = 962,438) | Comparison cohort: 1996-1999 (no. = 187,046) | Comparison cohort: 2000-2003 (no. = 205,228) | Comparison cohort: 2004-2007 (no. = 247,323) | Comparison cohort: 2008-2011 (no. = 322,841) |
|----------------------------------------|----------------------------------------------------|----------------------------------------------|----------------------------------------------|----------------------------------------------|----------------------------------------------|
| Male sex                               | 517,916 (54)                                       | 103,634 (55)                                 | 113,223 (55)                                 | 130,020 (53)                                 | 171,039 (53)                                 |
| Median age – yr (QL-QU)                | 60.5 (50.9, 69.9)                                  | 62.2 (52.3, 72.8)                            | 60.4 (51.5, 70.7)                            | 59.7 (49.7, 68.8)                            | 60.5 (50.6, 68.6)                            |
| Hypertension                           | 261,949 (27)                                       | 46,454 (25)                                  | 51,458 (25)                                  | 66,406 (27)                                  | 97,631 (30)                                  |
| Heart failure                          | 11,468 (1)                                         | 2,054 (1)                                    | 2,721 (1)                                    | 3,139 (1)                                    | 3,554 (1)                                    |
| Moderate to severe renal disease       | 6,056 (1)                                          | 934 (0)                                      | 1,076 (1)                                    | 1,631 (1)                                    | 2,415 (1)                                    |
| Atrial fibrillation                    | 5,752 (1)                                          | 661 (0)                                      | 1,009 (0)                                    | 1,590 (1)                                    | 2,492 (1)                                    |
| Connective tissue disease              | 21,881 (2)                                         | 3,548 (2)                                    | 4,255 (2)                                    | 5,579 (2)                                    | 8,499 (3)                                    |
| Any malignancy (excluding skin cancer) | 60,851 (6)                                         | 10,559 (6)                                   | 11,950 (6)                                   | 15,204 (6)                                   | 23,138 (7)                                   |
| Moderate to severe liver disease       | 5,752 (1)                                          | 661 (0)                                      | 1,009 (0)                                    | 1,590 (1)                                    | 2,492 (1)                                    |
| Obesity (ICD registered)               | 11,108 (1)                                         | 484 (0)                                      | 1,062 (1)                                    | 2,806 (1)                                    | 6,756 (2)                                    |
| Markers of smoking                     | 89,742 (9)                                         | 17,096 (14)                                  | 18,102 (14)                                  | 22,313 (14)                                  | 32,231 (10)                                  |
| <i>Medical treatment</i>               |                                                    |                                              |                                              |                                              |                                              |
| Statins                                | 64,476 (7)                                         | 2,177 (1)                                    | 5,239 (3)                                    | 16,593 (7)                                   | 40,467 (13)                                  |
| Beta-blocker                           | 77,740 (8)                                         | 11,862 (6)                                   | 15,355 (7)                                   | 21,753 (9)                                   | 28,770 (9)                                   |
| ACE inhibitor                          | 72,070 (7)                                         | 8,125 (4)                                    | 10,009 (5)                                   | 18,137 (7)                                   | 35,799 (11)                                  |
| ARB                                    | 47,474 (5)                                         | 2,691 (1)                                    | 7,597 (4)                                    | 13,711 (6)                                   | 23,475 (7)                                   |
| Calcium channel blocker                | 80,016 (8)                                         | 13,410 (7)                                   | 14,679 (7)                                   | 18,806 (8)                                   | 33,121 (10)                                  |
| Thiazide                               | 93,086 (10)                                        | 16,013 (9)                                   | 18,735 (9)                                   | 25,626 (10)                                  | 32,712 (10)                                  |
| Aspirin                                | 81,206 (8)                                         | 15,255 (8)                                   | 16,471 (8)                                   | 21,286 (9)                                   | 28,194 (9)                                   |
| ADP receptor inhibitor                 | 1,115 (0)                                          | <5 (0)                                       | 99 (0)                                       | 248 (0)                                      | 766 (0)                                      |
| VKA                                    | 17,267 (2)                                         | 2,246 (1)                                    | 3,020 (1)                                    | 4,683 (2)                                    | 7,318 (2)                                    |

Numbers are counts (%) unless otherwise indicated. ARB, angiotensin II receptor blocker; QL, lower quartile; QU, upper quartile; VKA, vitamin K antagonist.

Supplemental Table S5. Risk of cardiac outcomes and all-cause death in patients with incident type 2 diabetes versus matched cohort

|                              | Matched cohort       |              |                                          |                      | Diabetes vs. matched cohort |                                     |                                                     |                                           |
|------------------------------|----------------------|--------------|------------------------------------------|----------------------|-----------------------------|-------------------------------------|-----------------------------------------------------|-------------------------------------------|
|                              | Matched cohort (no.) | Events (no.) | Event rate per 100 person-years (95% CI) | 7-year CIP* (95% CI) | 7-year risk difference †    | Crude 7-year hazard ratio† (95% CI) | Sex- and age-adjusted 7-year hazard ratio† (95% CI) | Adjusted 7-year hazard ratio†, ‡ (95% CI) |
| <b>Myocardial infarction</b> |                      |              |                                          |                      |                             |                                     |                                                     |                                           |
| 1996-1999                    | 187,046              | 13,850       | 0.5 (0.5 - 0.5)                          | 3.6 (3.5 - 3.7)      | 3.3                         | 1.90 (1.84 - 1.96)                  | 2.00 (1.94-2.07)                                    | 1.92 (1.86 - 1.99)                        |
| 2000-2003                    | 205,228              | 11,564       | 0.4 (0.4 - 0.4)                          | 3.0 (2.9 - 3.1)      | 2.2                         | 1.71 (1.64 - 1.77)                  | 1.73 (1.67-1.80)                                    | 1.60 (1.54 - 1.67)                        |
| 2004-2007                    | 247,323              | 9,335        | 0.3 (0.3 - 0.3)                          | 2.3 (2.3 - 2.4)      | 1.1                         | 1.48 (1.41 - 1.54)                  | 1.46 (1.40-1.53)                                    | 1.36 (1.30 - 1.42)                        |
| 2008-2011                    | 322,841              | 7,617        | 0.3 (0.3 - 0.3)                          | 2.0 (2.0 - 2.1)      | 0.8                         | 1.38 (1.32 - 1.45)                  | 1.34 (1.28-1.41)                                    | 1.29 (1.22 - 1.35)                        |
| <b>Cardiac death</b>         |                      |              |                                          |                      |                             |                                     |                                                     |                                           |
| 1996-1999                    | 187,046              | 15,729       | 0.6 (0.5 - 0.6)                          | 4.4 (4.3 - 4.5)      | 2.7                         | 1.59 (1.54 - 1.65)                  | 1.77 (1.71-1.83)                                    | 1.62 (1.56 - 1.67)                        |
| 2000-2003                    | 205,228              | 10,016       | 0.4 (0.4 - 0.4)                          | 2.8 (2.7 - 2.8)      | 1.4                         | 1.53 (1.47 - 1.60)                  | 1.59 (1.53-1.66)                                    | 1.41 (1.35 - 1.47)                        |
| 2004-2007                    | 247,323              | 6,171        | 0.2 (0.2 - 0.2)                          | 1.6 (1.6 - 1.7)      | 0.9                         | 1.51 (1.43 - 1.59)                  | 1.50 (1.43-1.58)                                    | 1.31 (1.24 - 1.38)                        |
| 2008-2011                    | 322,841              | 3,730        | 0.1 (0.1 - 0.1)                          | 1.1 (1.0 - 1.1)      | 0.5                         | 1.53 (1.44 - 1.64)                  | 1.45 (1.36-1.55)                                    | 1.35 (1.26 - 1.44)                        |
| <b>All-cause death</b>       |                      |              |                                          |                      |                             |                                     |                                                     |                                           |
| 1996-1999                    | 187,046              | 96,862       | 3.4 (3.4 - 3.4)                          | 18.4 (18.2 - 18.6)   | 10.6                        | 1.56 (1.54 - 1.58)                  | 1.73 (1.70-1.75)                                    | 1.63 (1.61 - 1.65)                        |
| 2000-2003                    | 205,228              | 76,554       | 2.7 (2.7 - 2.7)                          | 15.2 (15.0 - 15.3)   | 9.2                         | 1.58 (1.56 - 1.61)                  | 1.65 (1.63-1.68)                                    | 1.54 (1.52 - 1.57)                        |
| 2004-2007                    | 247,323              | 59,150       | 2.1 (2.1 - 2.1)                          | 12.3 (12.2 - 12.5)   | 7.6                         | 1.58 (1.56 - 1.61)                  | 1.59 (1.56-1.61)                                    | 1.53 (1.50 - 1.56)                        |
| 2008-2011                    | 322,841              | 45,941       | 1.7 (1.7 - 1.7)                          | 10.9 (10.7 - 10.9)   | 6.0                         | 1.57 (1.54 - 1.60)                  | 1.50 (1.48-1.53)                                    | 1.51 (1.48 - 1.54)                        |

\*7-year CIP for myocardial infarction and cardiac death was adjusted for the competing risk of death.

†Matched cohort from same calendar period were used as reference.

‡Adjusted for age, sex, heart failure, renal disease, hypertension, markers of smoking, obesity, hypercholesterolemia, and alcohol-related disorders.  
CIP, cumulated incidence proportion.

Supplemental Table S6. Proportion of patients with incident type 2 diabetes redeeming prescriptions for prophylactic cardiovascular medications

|                                  | 1996-1999<br>(no. = 39,546) | 2000-2003<br>(no. = 44,364) | 2004-2007<br>(no. = 54,122) | 2008-2011<br>(no. = 71,279) |
|----------------------------------|-----------------------------|-----------------------------|-----------------------------|-----------------------------|
| Statins                          |                             |                             |                             |                             |
| Within $\pm 1$ year of inclusion | 1,905 (5)                   | 9,393 (21)                  | 25,916 (48)                 | 42,581 (60)                 |
| Initiated after inclusion        | 941 (2)                     | 5,035 (11)                  | 9,359 (17)                  | 10,821 (15)                 |
| Beta-blockers                    |                             |                             |                             |                             |
| Within $\pm 1$ year of inclusion | 4,883 (12)                  | 7,653 (17)                  | 10,503 (19)                 | 15,004 (21)                 |
| Initiated after inclusion        | 1,013 (3)                   | 1,656 (4)                   | 1,708 (3)                   | 2,154 (3)                   |
| ACE inhibitor                    |                             |                             |                             |                             |
| Within $\pm 1$ year of inclusion | 7,380 (19)                  | 11,008 (25)                 | 16,501 (30)                 | 25,857 (36)                 |
| Initiated after inclusion        | 2,504 (6)                   | 4,069 (9)                   | 5,133 (9)                   | 6,638 (9)                   |
| ARB                              |                             |                             |                             |                             |
| Within $\pm 1$ year of inclusion | 2,047 (5)                   | 5,766 (13)                  | 10,206 (19)                 | 14,993 (21)                 |
| Initiated after inclusion        | 887 (2)                     | 2,079 (5)                   | 2,879 (5)                   | 3,501 (5)                   |
| Calcium channel blockers         |                             |                             |                             |                             |
| Within $\pm 1$ year of inclusion | 6,470 (16)                  | 7,227 (16)                  | 10,421 (19)                 | 17,875 (25)                 |
| Initiated after inclusion        | 1,258 (3)                   | 1,532 (3)                   | 2,599 (5)                   | 3,883 (5)                   |
| Thiazides                        |                             |                             |                             |                             |
| Within $\pm 1$ year of inclusion | 5,815 (15)                  | 7,987 (18)                  | 10,937 (20)                 | 13,653 (19)                 |
| Initiated after inclusion        | 1,307 (3)                   | 1,906 (4)                   | 2,222 (4)                   | 2,350 (3)                   |
| Aspirin                          |                             |                             |                             |                             |
| Within $\pm 1$ year of inclusion | 7,162 (18)                  | 10,637 (24)                 | 15,444 (29)                 | 19,169 (27)                 |
| Initiated after inclusion        | 2,048 (5)                   | 3,849 (9)                   | 4,496 (8)                   | 4,119 (6)                   |
| ADP receptor inhibitors          |                             |                             |                             |                             |
| Within $\pm 1$ year of inclusion | 32 (0)                      | 318 (1)                     | 499 (1)                     | 923 (1)                     |
| Initiated after inclusion        | 28 (0)                      | 295 (1)                     | 410 (1)                     | 692 (1)                     |
| Vitamin K antagonist             |                             |                             |                             |                             |
| Within $\pm 1$ year of inclusion | 1,418 (4)                   | 1,971 (4)                   | 2,767 (5)                   | 3,962 (6)                   |
| Initiated after inclusion        | 404 (1)                     | 480 (1)                     | 505 (1)                     | 640 (1)                     |

Numbers are counts (%). Treatment  $\pm 1$  year of inclusion was defined as redemption of  $\geq 1$  prescription within 12 months before and/or 12 months after the inclusion date. Treatment initiated after inclusion was defined as redemption of  $\geq 1$  prescription within 12 months after the inclusion date.

ARB, angiotensin II receptor blocker.

Supplemental Figure S2. Risk of cardiac outcomes and all-cause death in patients with diabetes vs. matched cohort, stratified by sex and age-group at study inclusion

### Myocardial infarction

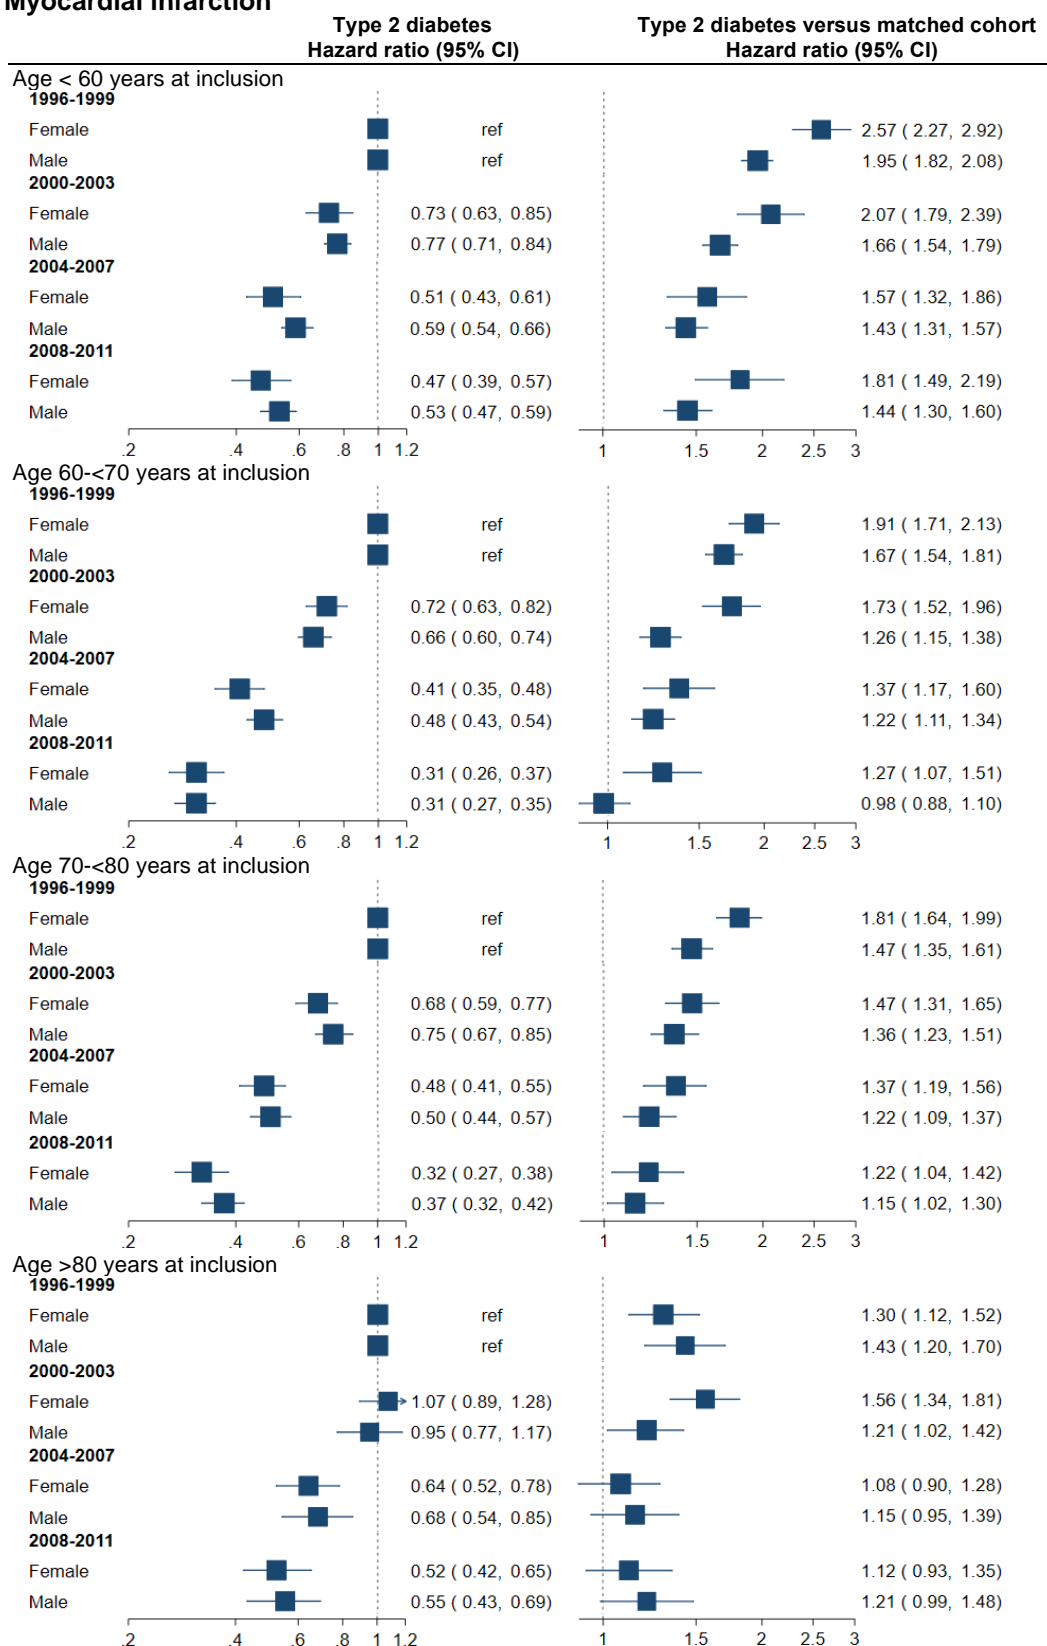

## Cardiac death

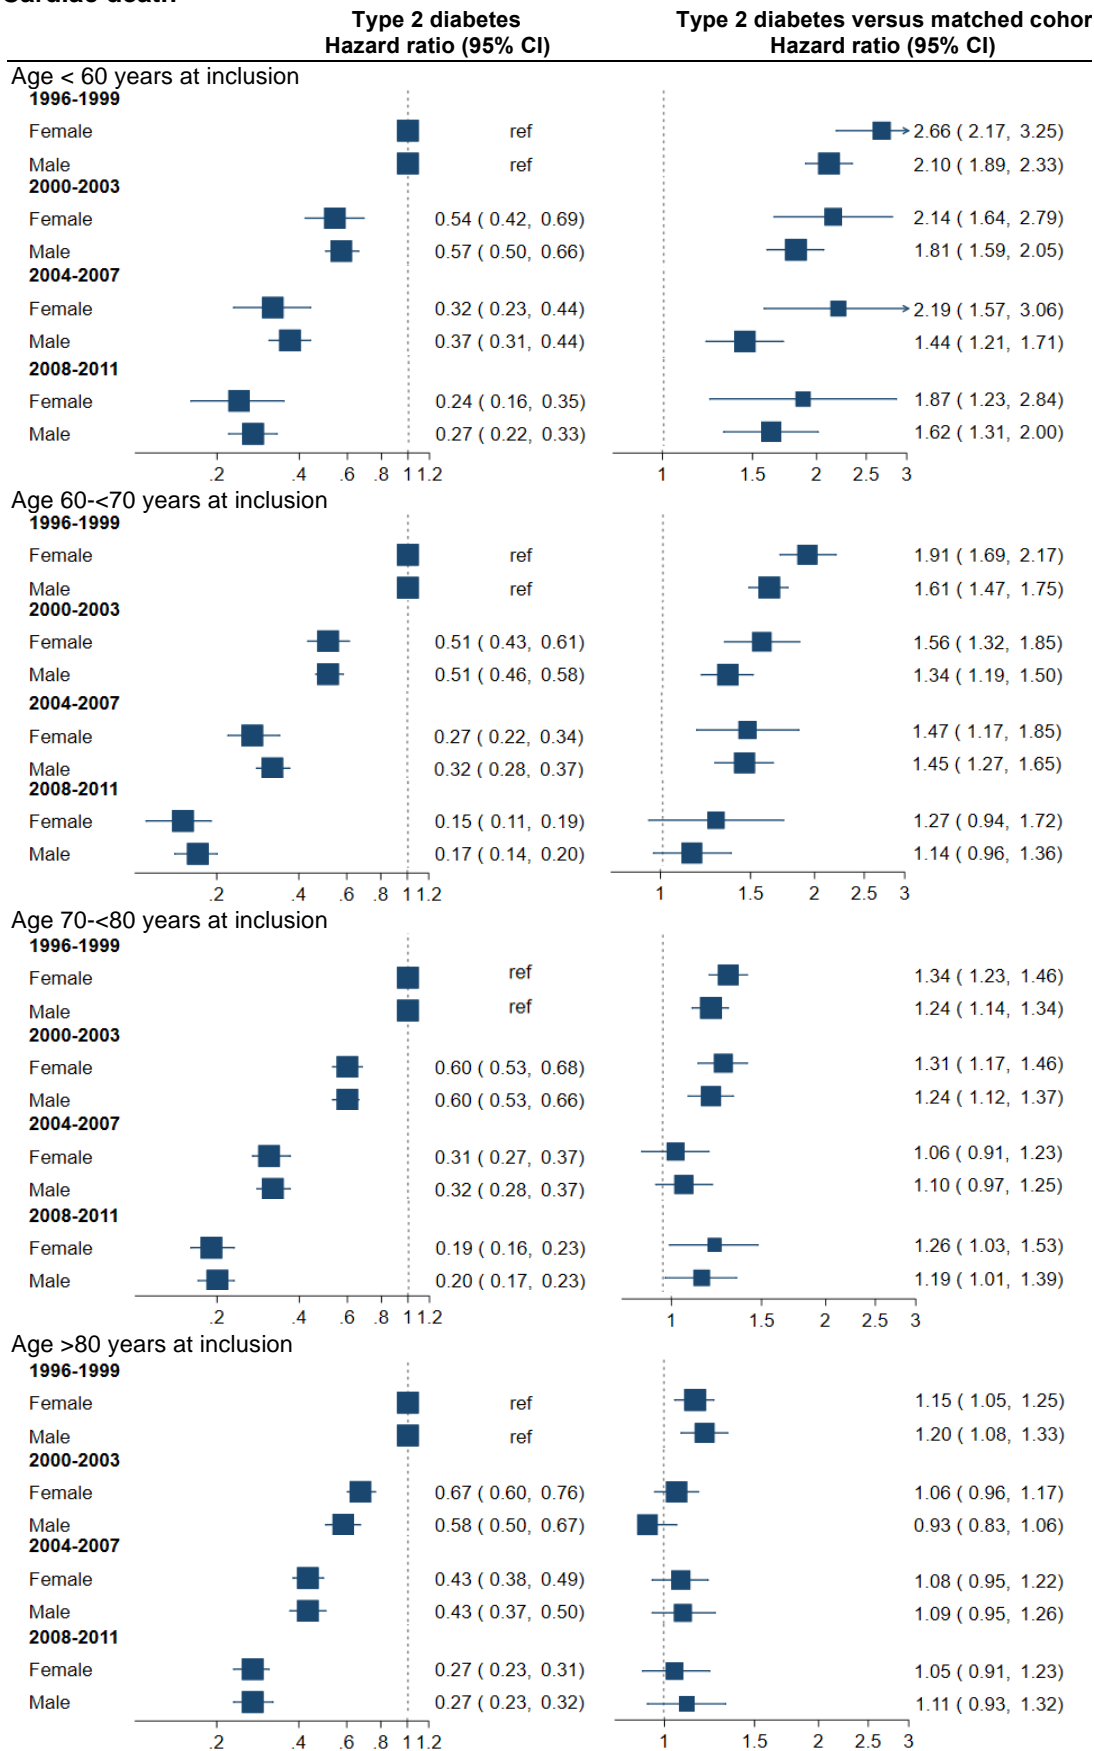

## All-cause death

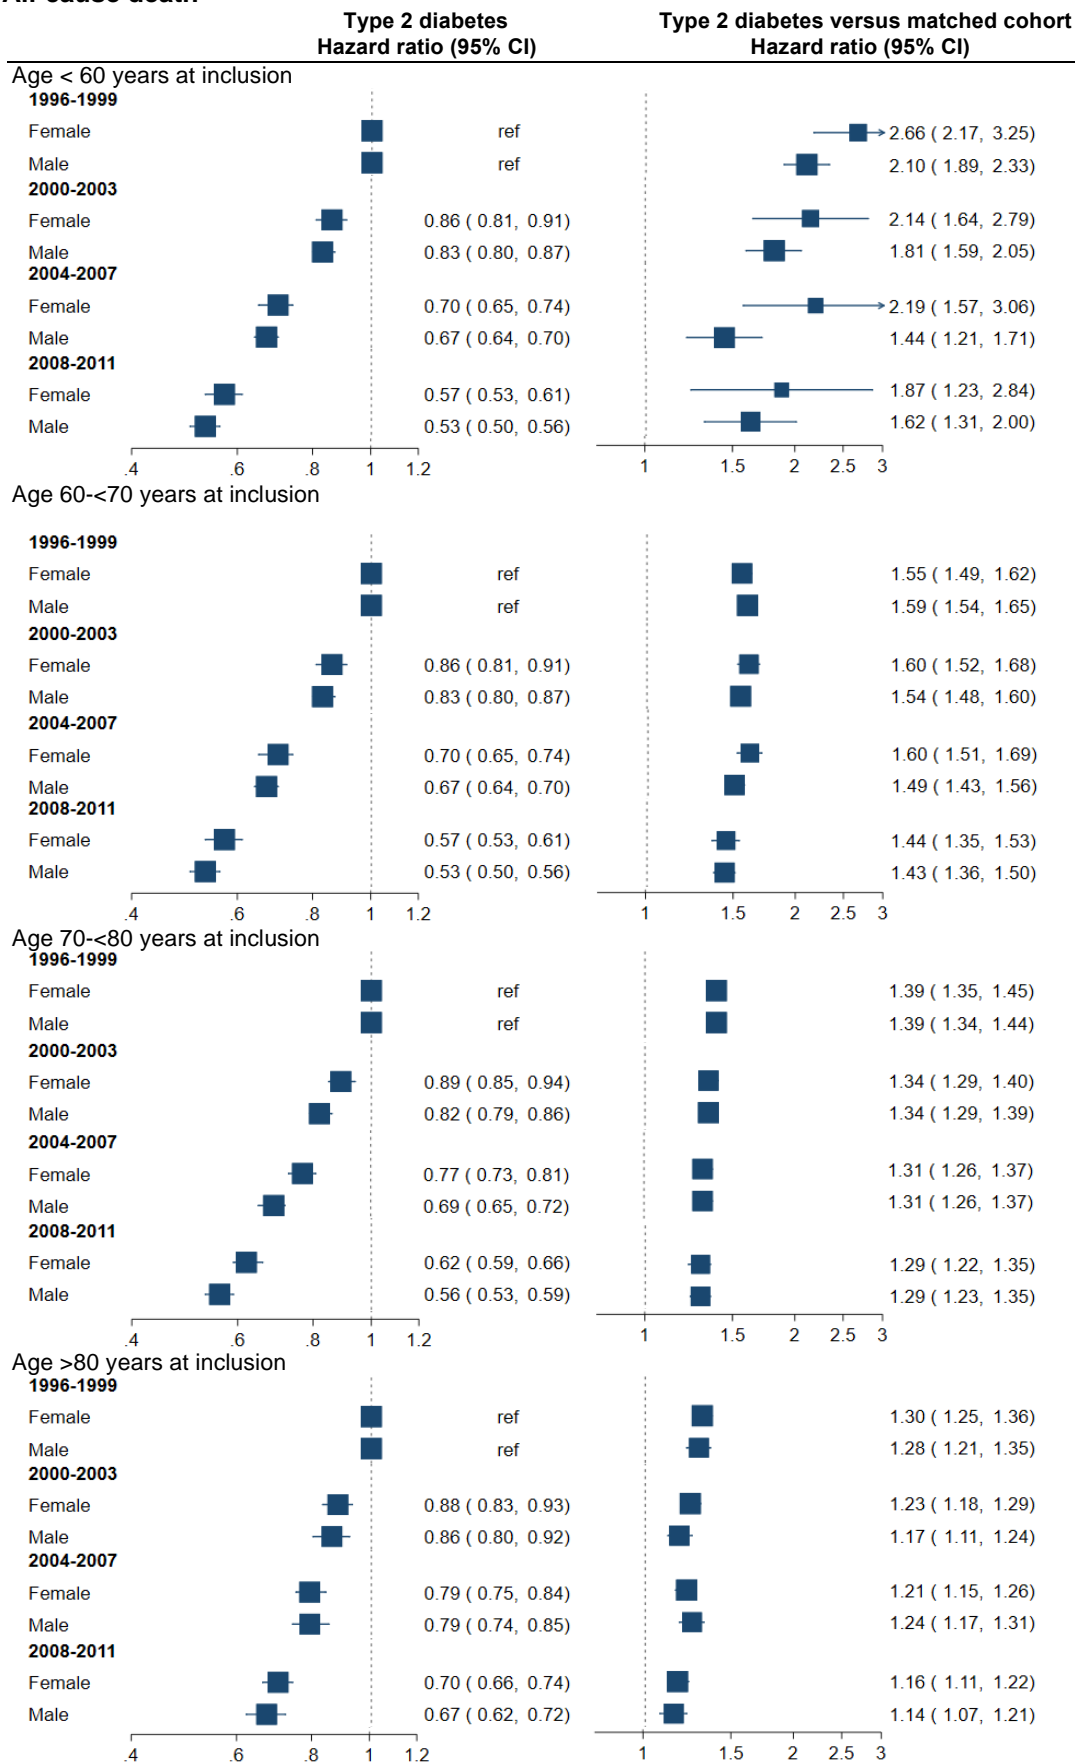

Supplemental Table S7. Association of cardiac outcomes and all-cause death with early statin use in patients with incident type 2 diabetes\*

|                       | Number at risk | Events | Crude hazard ratio (95% CI) | Adjusted hazard ratio† (95% CI) |
|-----------------------|----------------|--------|-----------------------------|---------------------------------|
| Myocardial infarction | 53,532         | 1,556  | 0.88 (0.79-0.98)            | 0.80 (0.71-0.90)                |
| Cardiac death         | 53,532         | 694    | 0.79 (0.68-0.92)            | 0.82 (0.70-0.97)                |
| All-cause death       | 53,532         | 8,976  | 0.71 (0.68-0.74)            | 0.68 (0.65-0.71)                |

\*For patients with incident type 2 diabetes included in 2008-2011, we compared patients initiating statin therapy before the inclusion date or within 12 months after the inclusion date vs. those who did not initiate statin therapy within 12 months after the inclusion date (either late-users or non-users).

†Adjusted for age, sex, heart failure, renal disease, hypertension, chronic obstructive pulmonary disease, use of antiplatelet drugs, use of any prophylactic cardiovascular medications, and early statin use (i.e. redemption of  $\geq 1$  prescription within 12 months after the inclusion date).
